# Supplementary material for: Racial and Ethnic Differences in Internal Medicine Residency Assessments
Source: PubMed Central journal article supplement (PMC9857126; doi:10.1001/jamanetworkopen.2022.47649), 2022-12-29
Supplement: jamanetwopen-e2247649-s001.pdf [file jamanetwopen-e2247649-s001.pdf]

## Supplementary Online Content

Boatright D, Anderson N, Kim JG, et al. Racial and ethnic differences in internal medicine residency assessments. *JAMA Netw Open*. 2022;5(12):e2247649. doi:10.1001/jamanetworkopen.2022.47649

**eFigure 1.** Racial and Ethnic Differences in Milestones Scores in Each of the 6 Competency Domains in the Unadjusted Model

**eFigure 2.** Racial and Ethnic Differences in Milestones Scores in Each of the 6 Competency Domains in the Adjusted Model

This supplementary material has been provided by the authors to give readers additional information about their work.

**eFigure 1.** Racial and Ethnic Differences in Milestones Scores in Each of the 6 Competency Domains in the Unadjusted Model

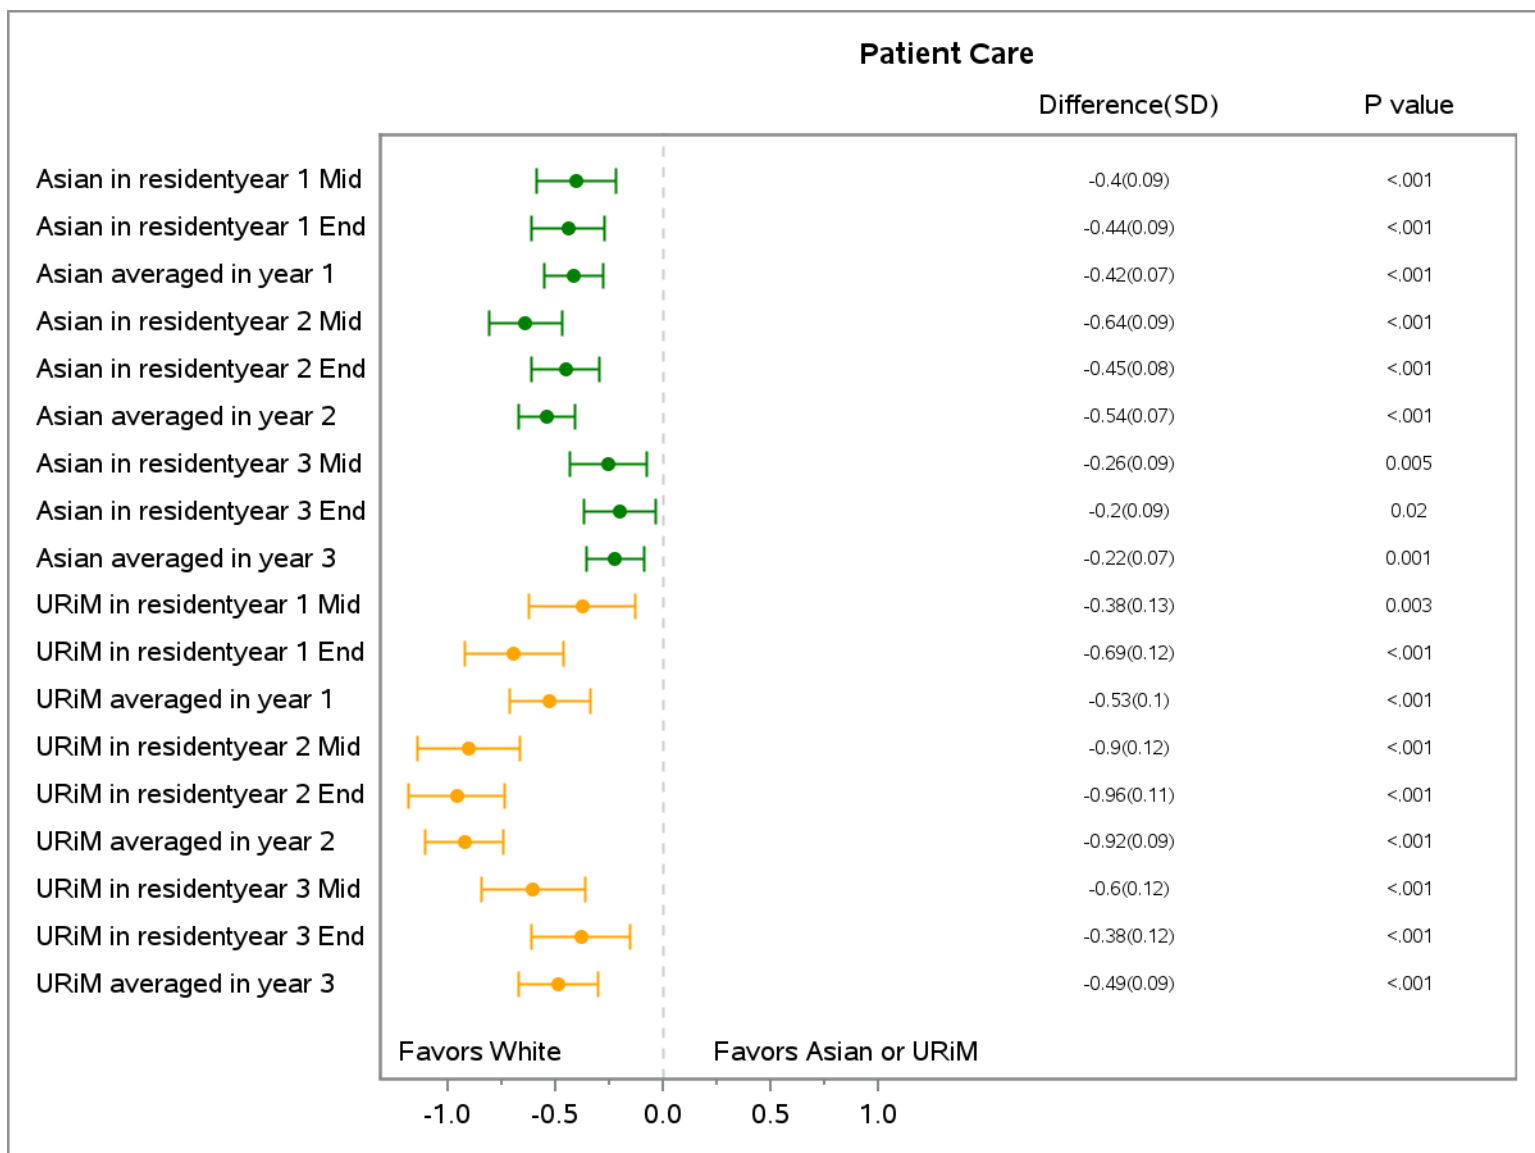

eFigure 1a. unadjusted Patient Care

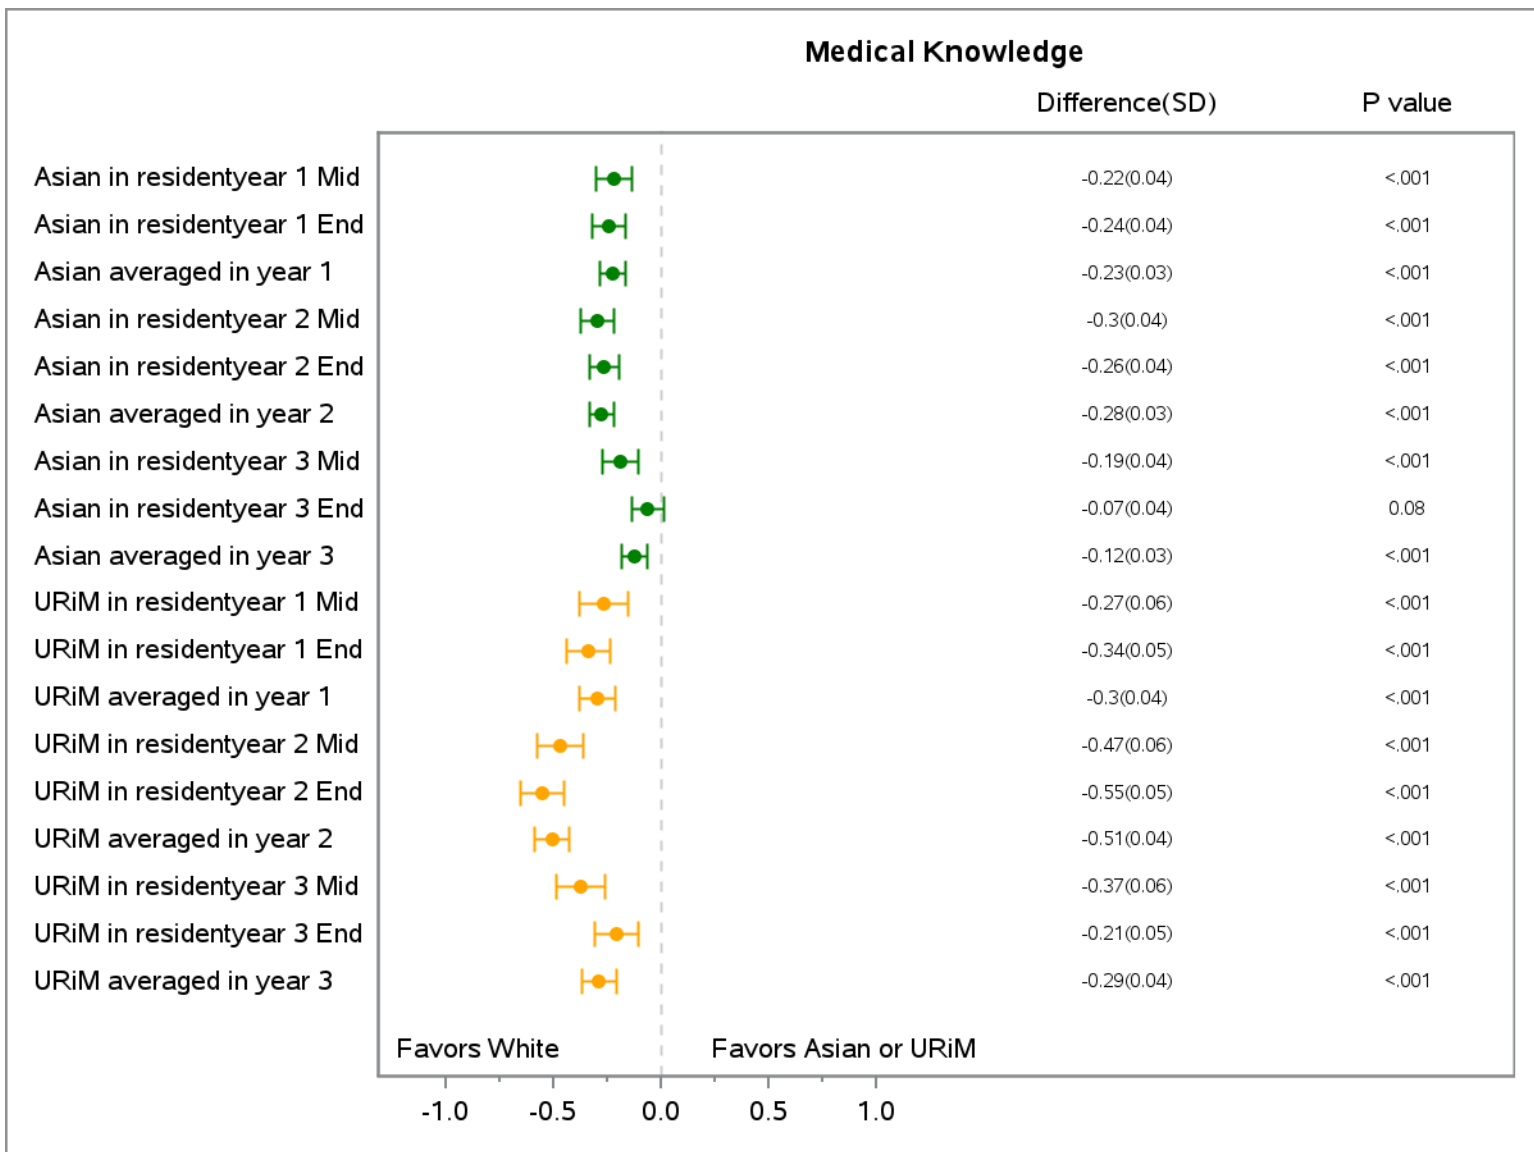

eFigure 1b. unadjusted Medical Knowledge

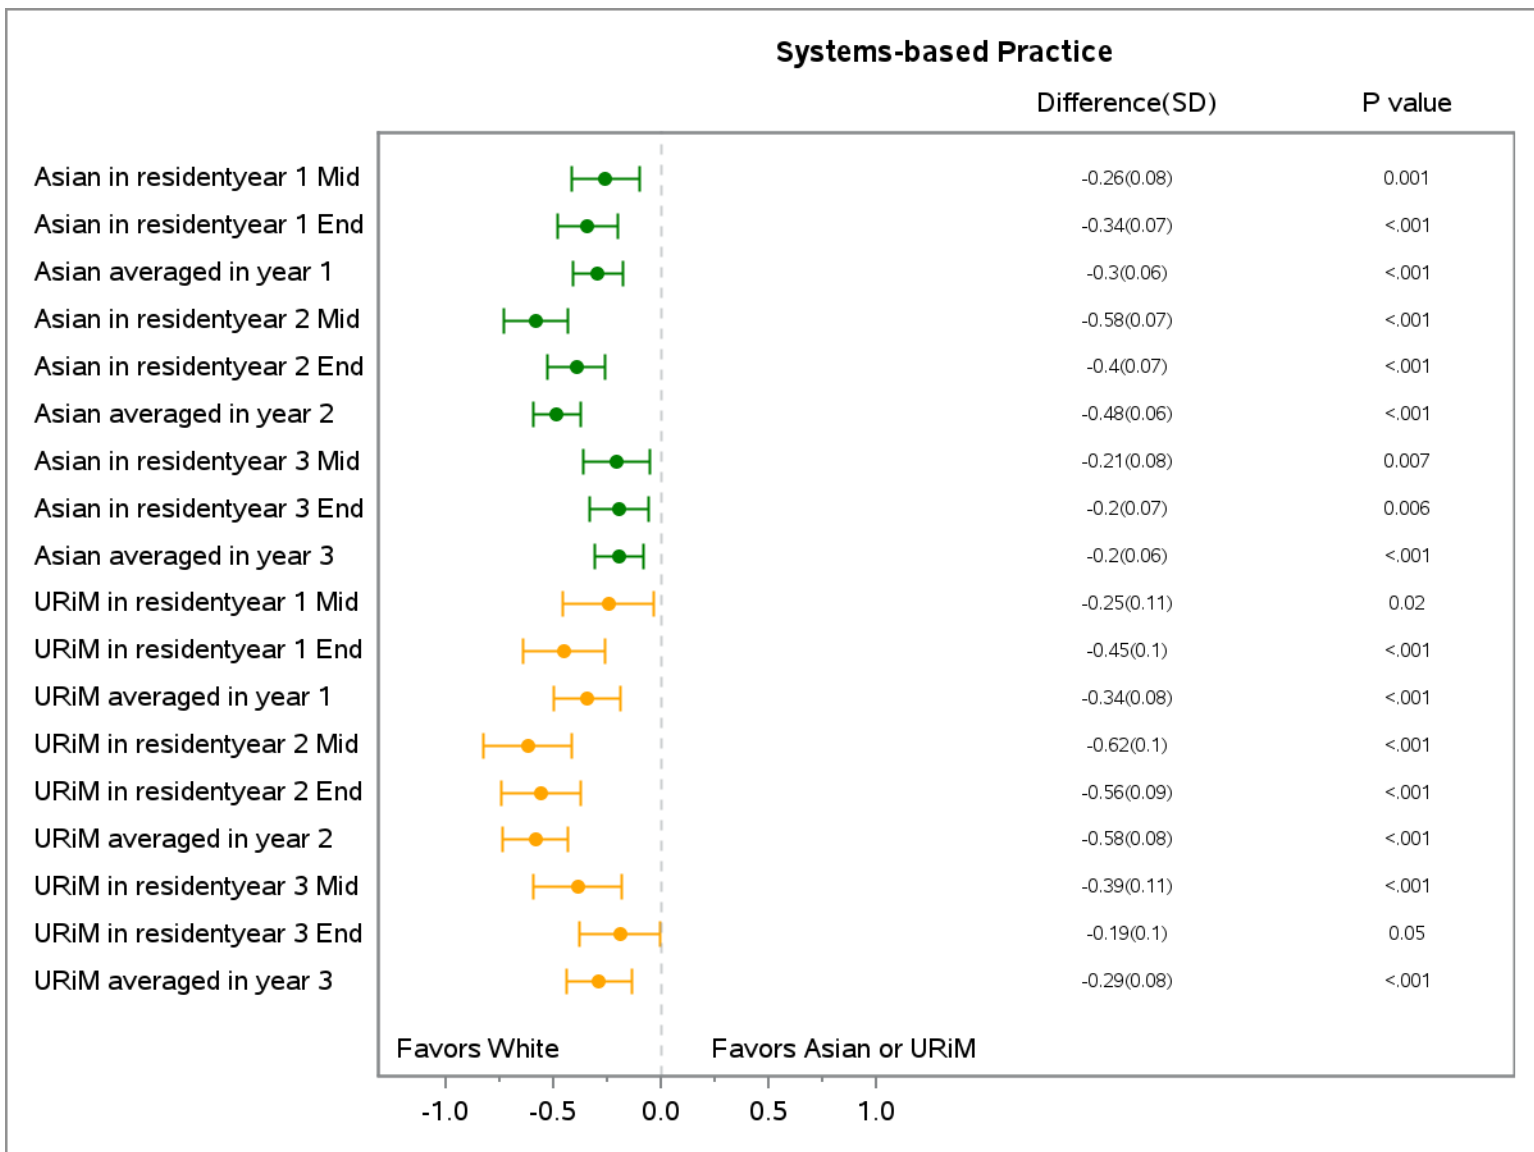

eFigure 1c. unadjusted System-based Practice

### Practice-Based Learning and Improvement

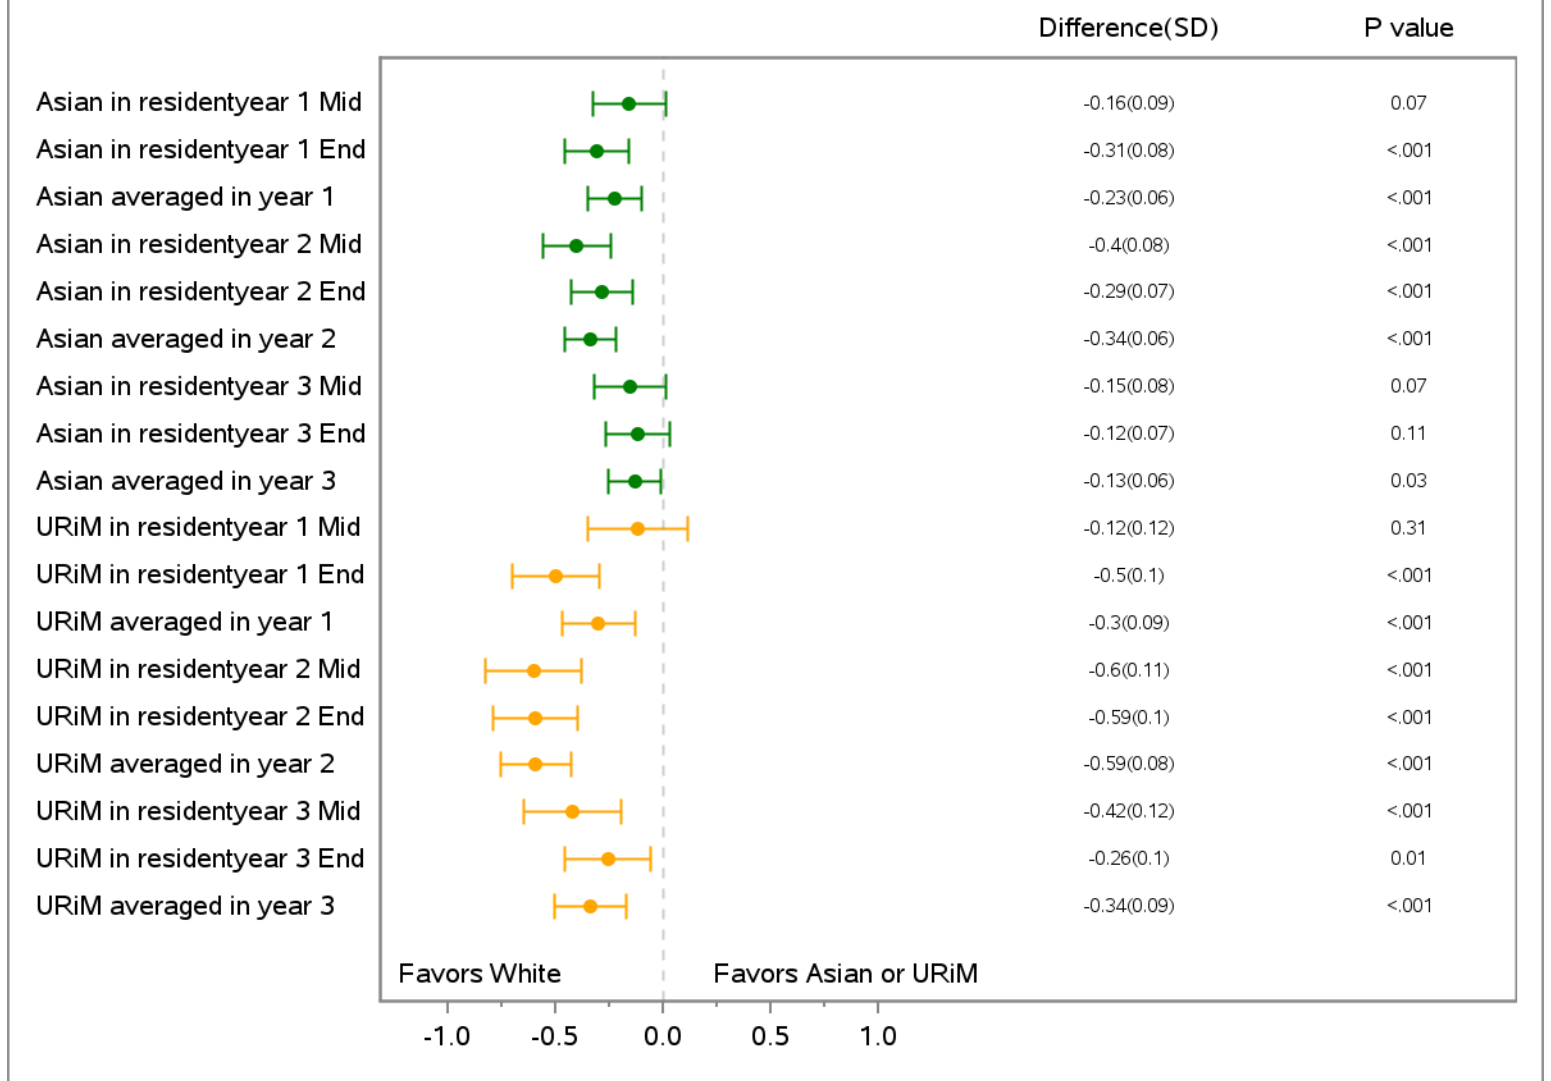

eFigure 1d. unadjusted Practice-based Learning and Improvement

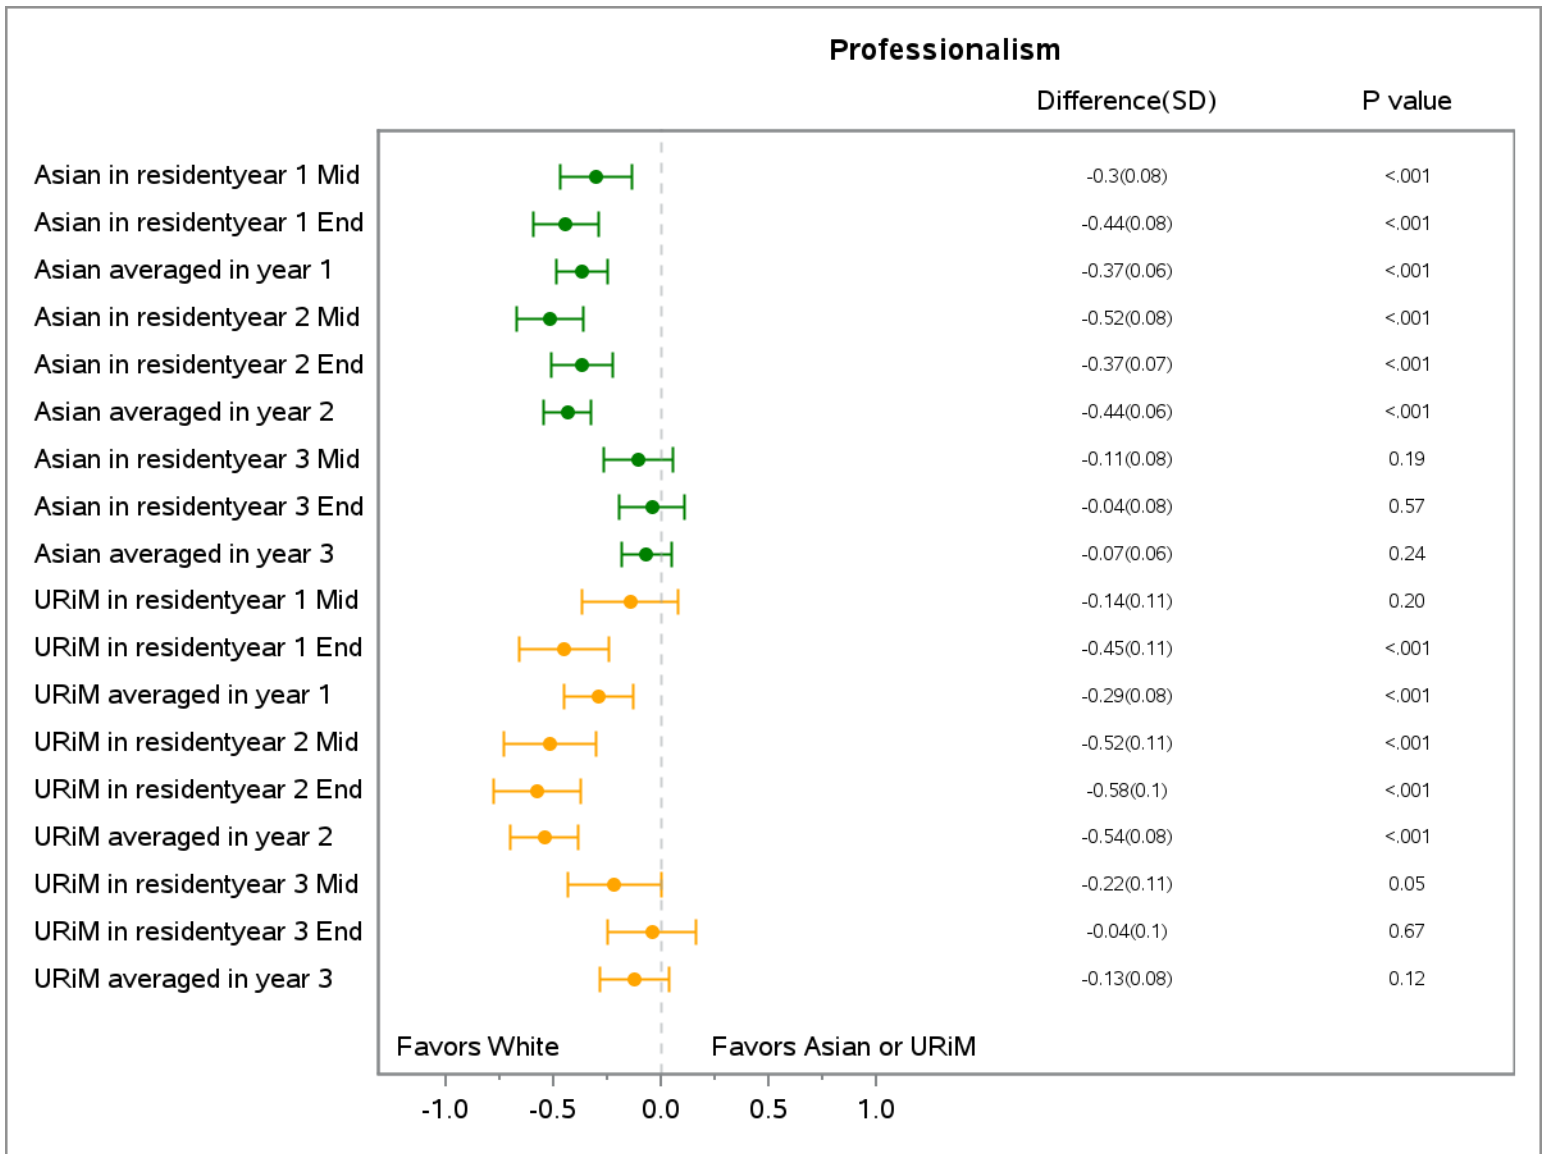

eFigure 1e. unadjusted Professionalism

### Interpersonal and Communications Skills

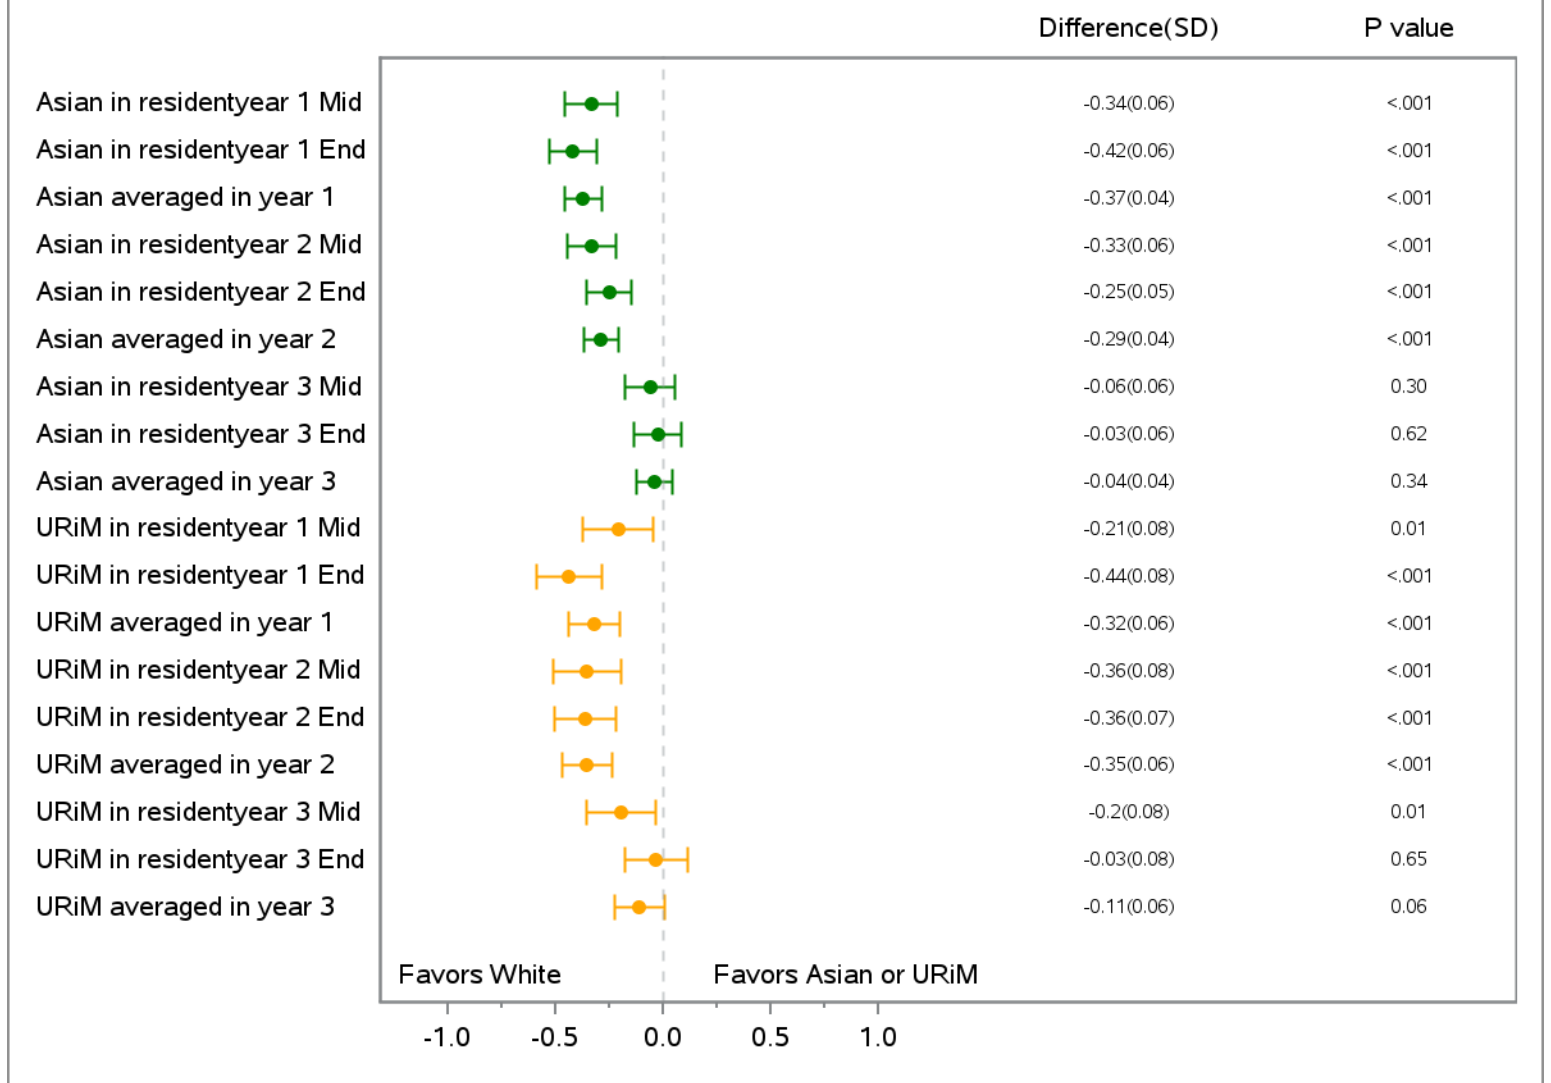

eFigure 1f. unadjusted Interpersonal and Communications Skills

**eFigure 2.** Racial and Ethnic Differences in Milestones Scores in Each of the 6 Competency Domains in the Adjusted Model

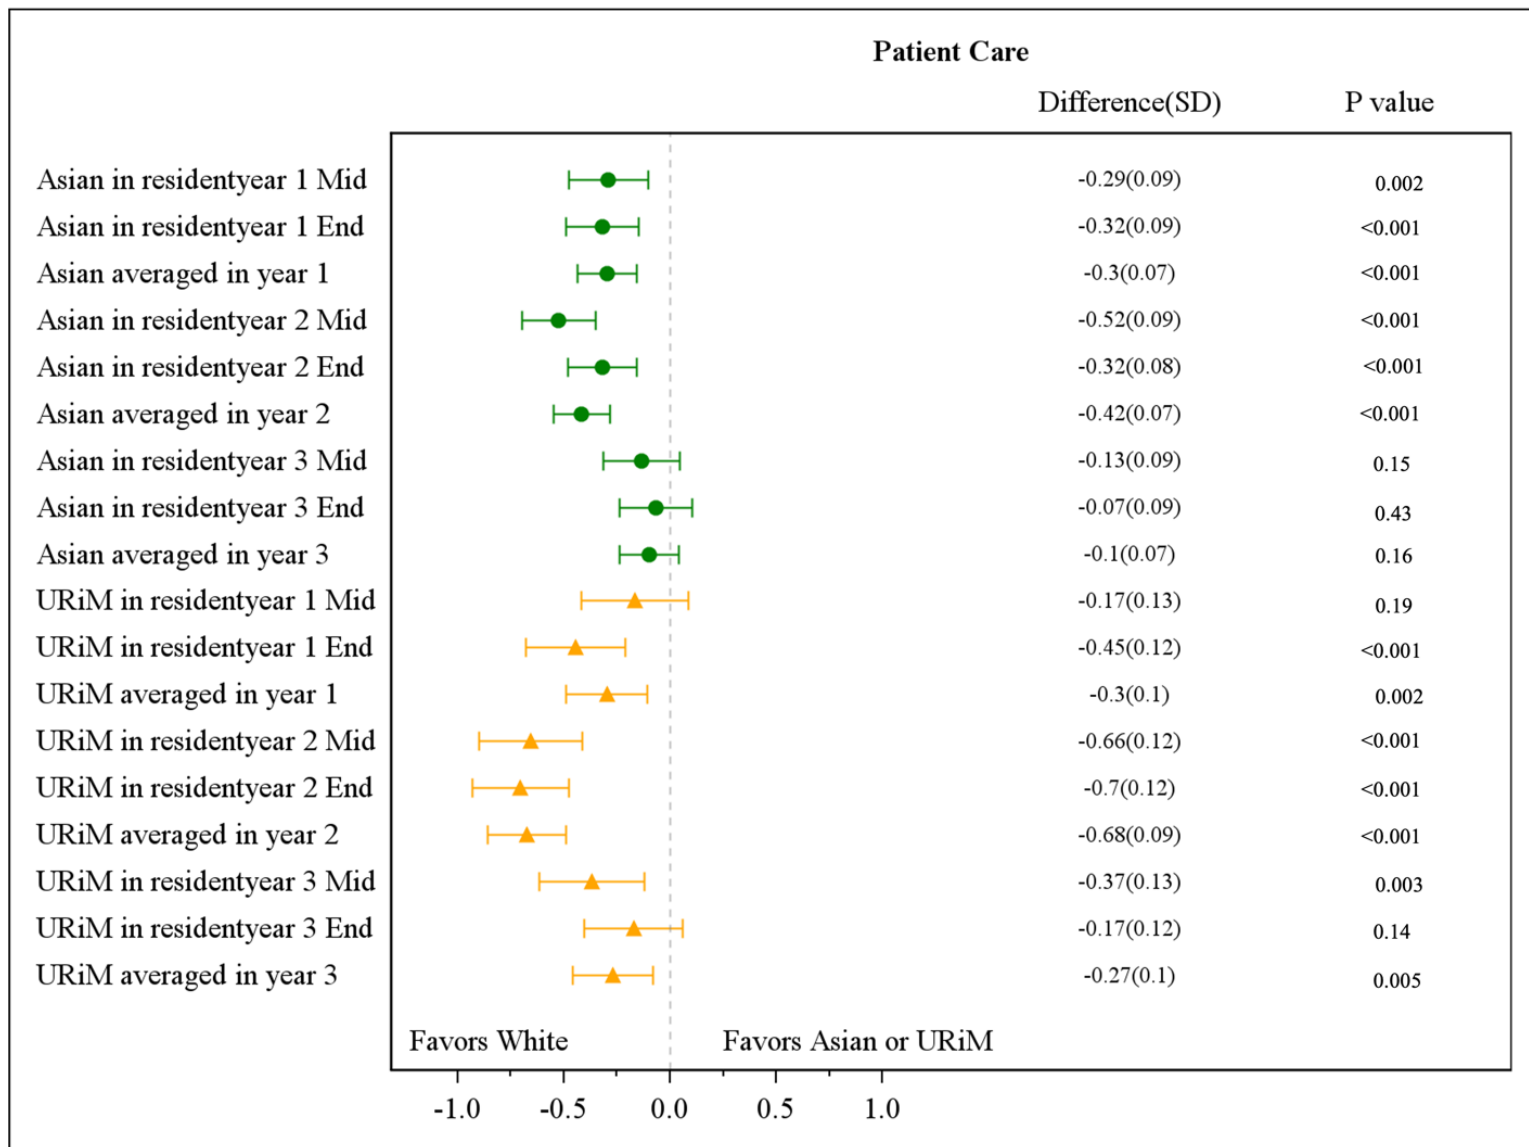

eFigure 2a. adjusted Patient Care



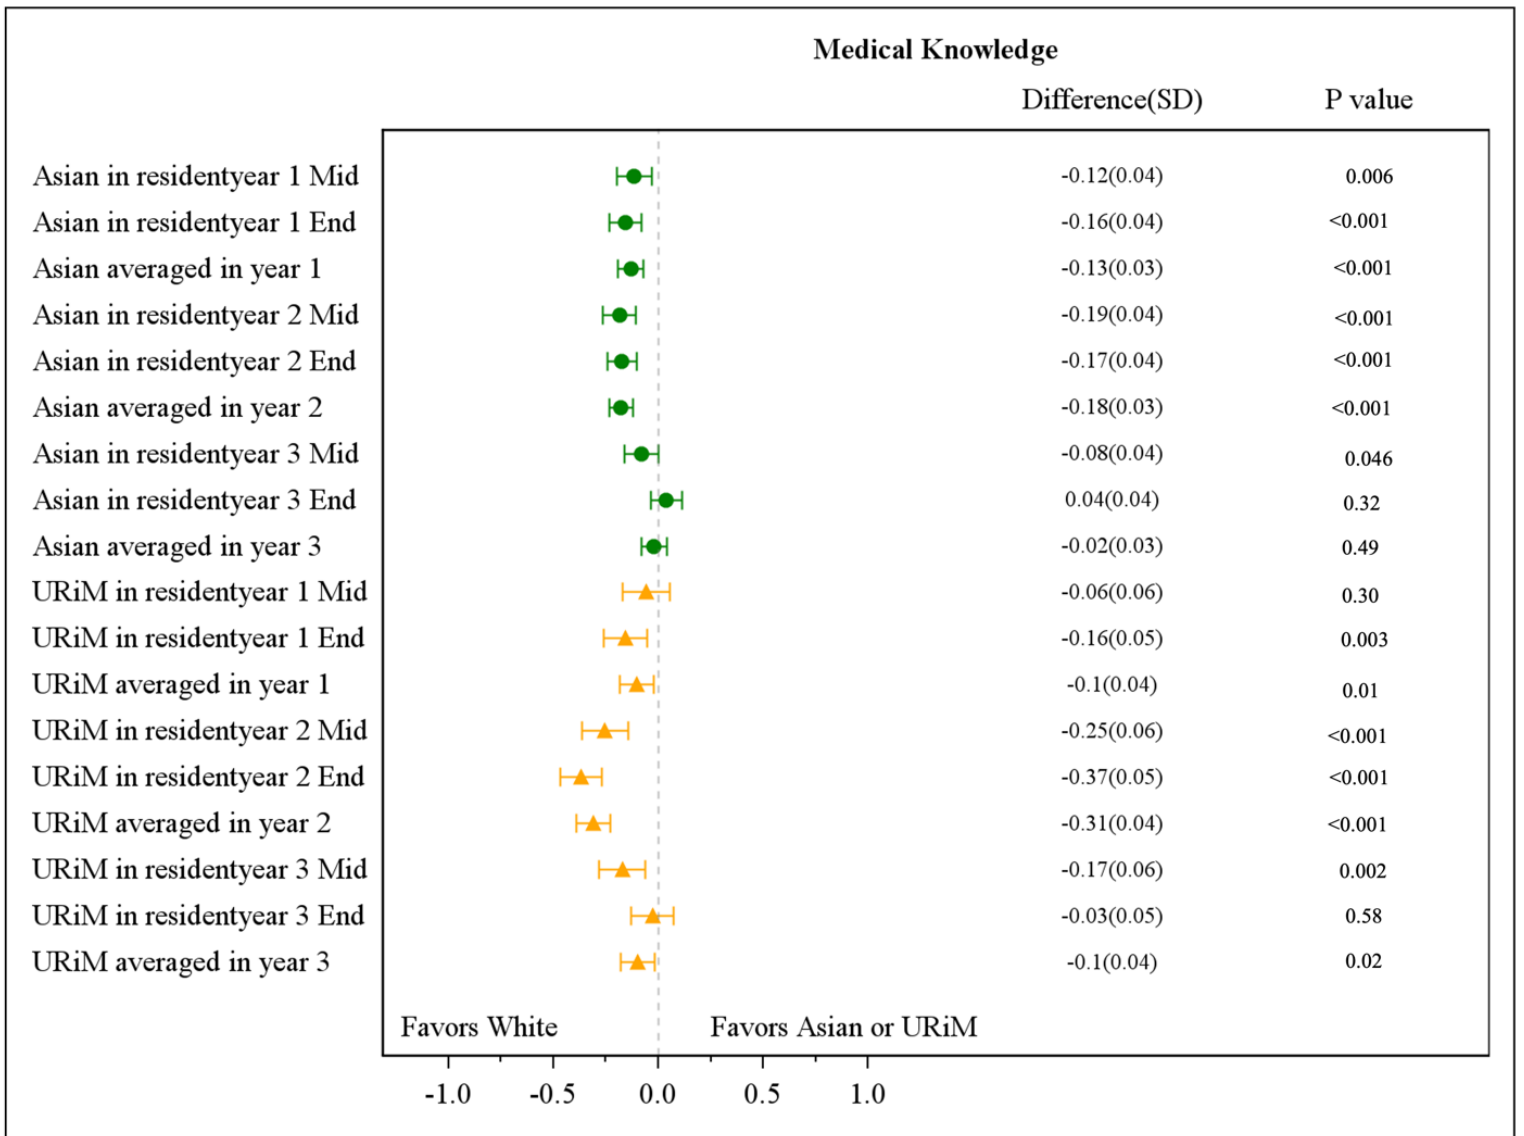

eFigure 2b. adjusted Medical Knowledge

### Systems-based Practice

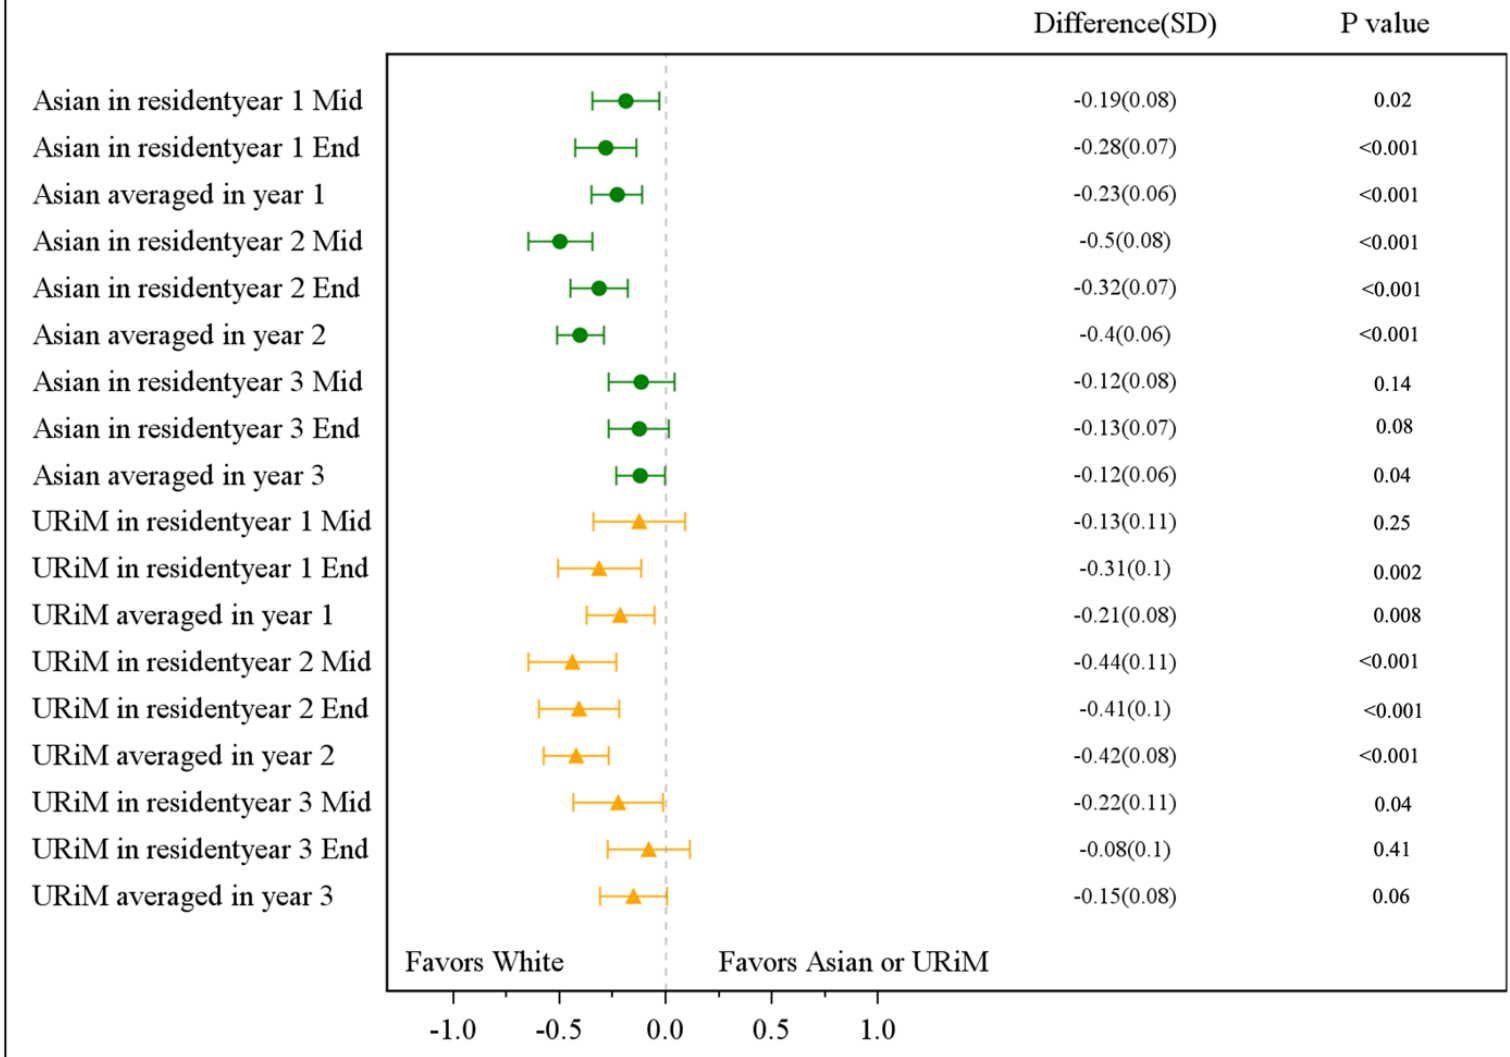

eFigure 2c. adjusted System-based Practice

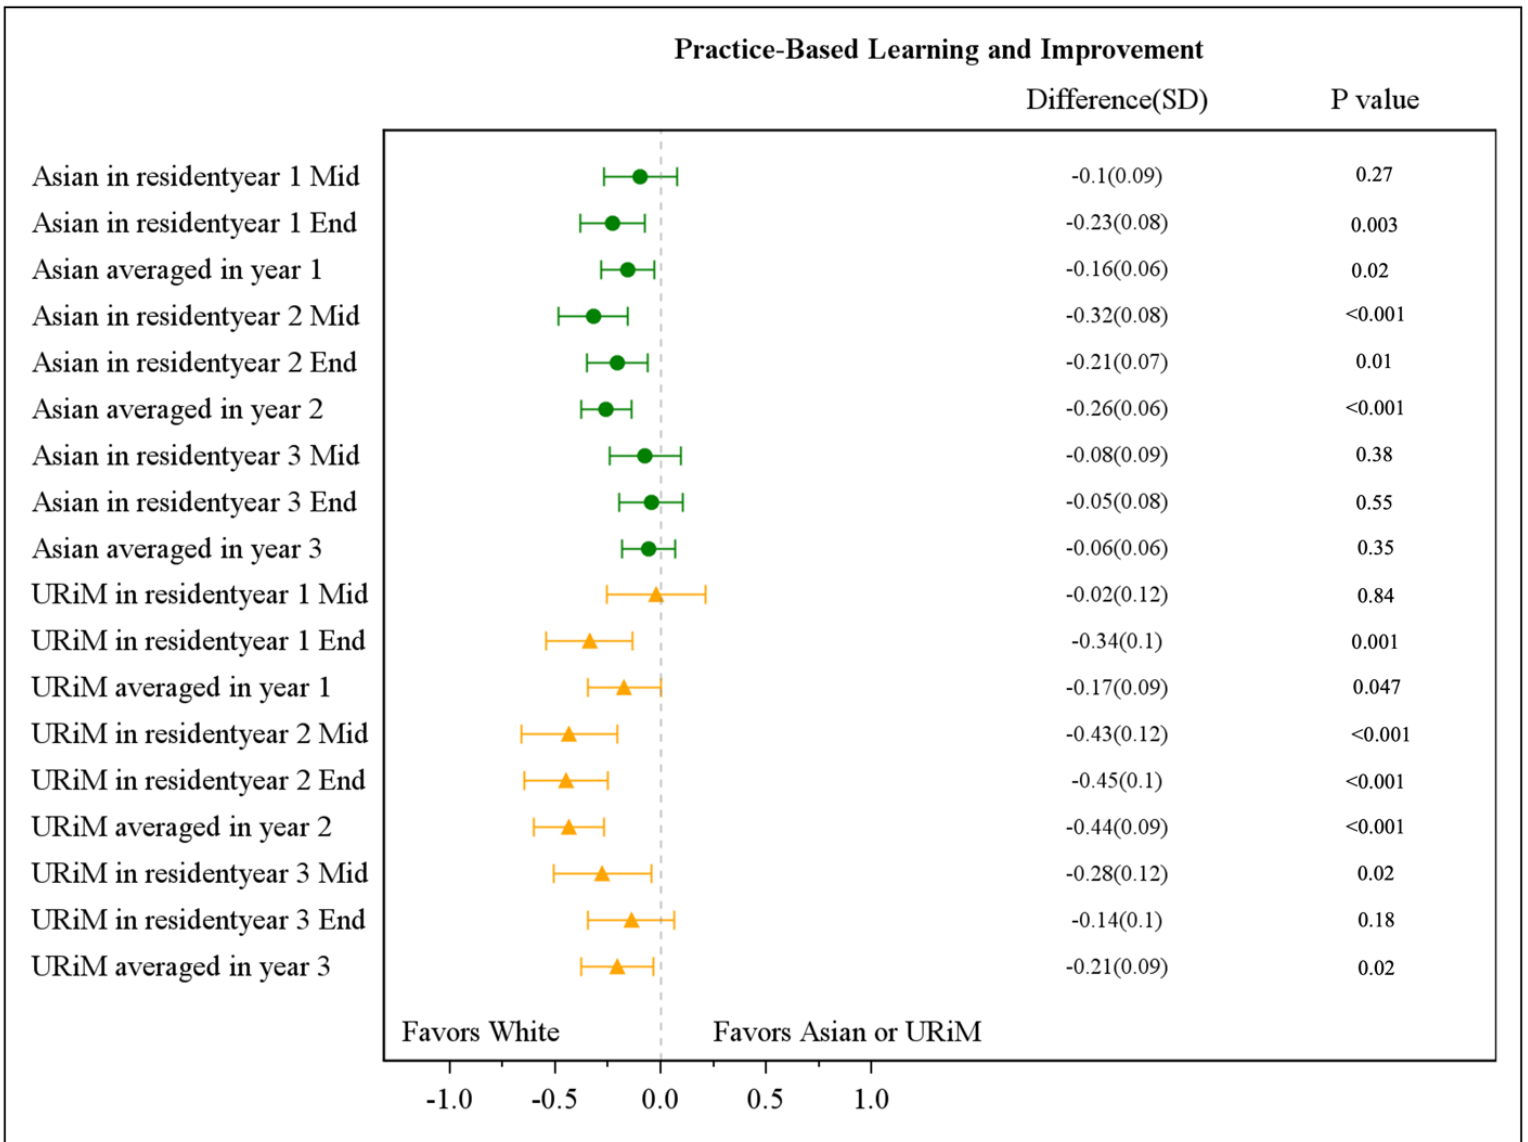

eFigure 2d. adjusted Practice-based Learning and Improvement

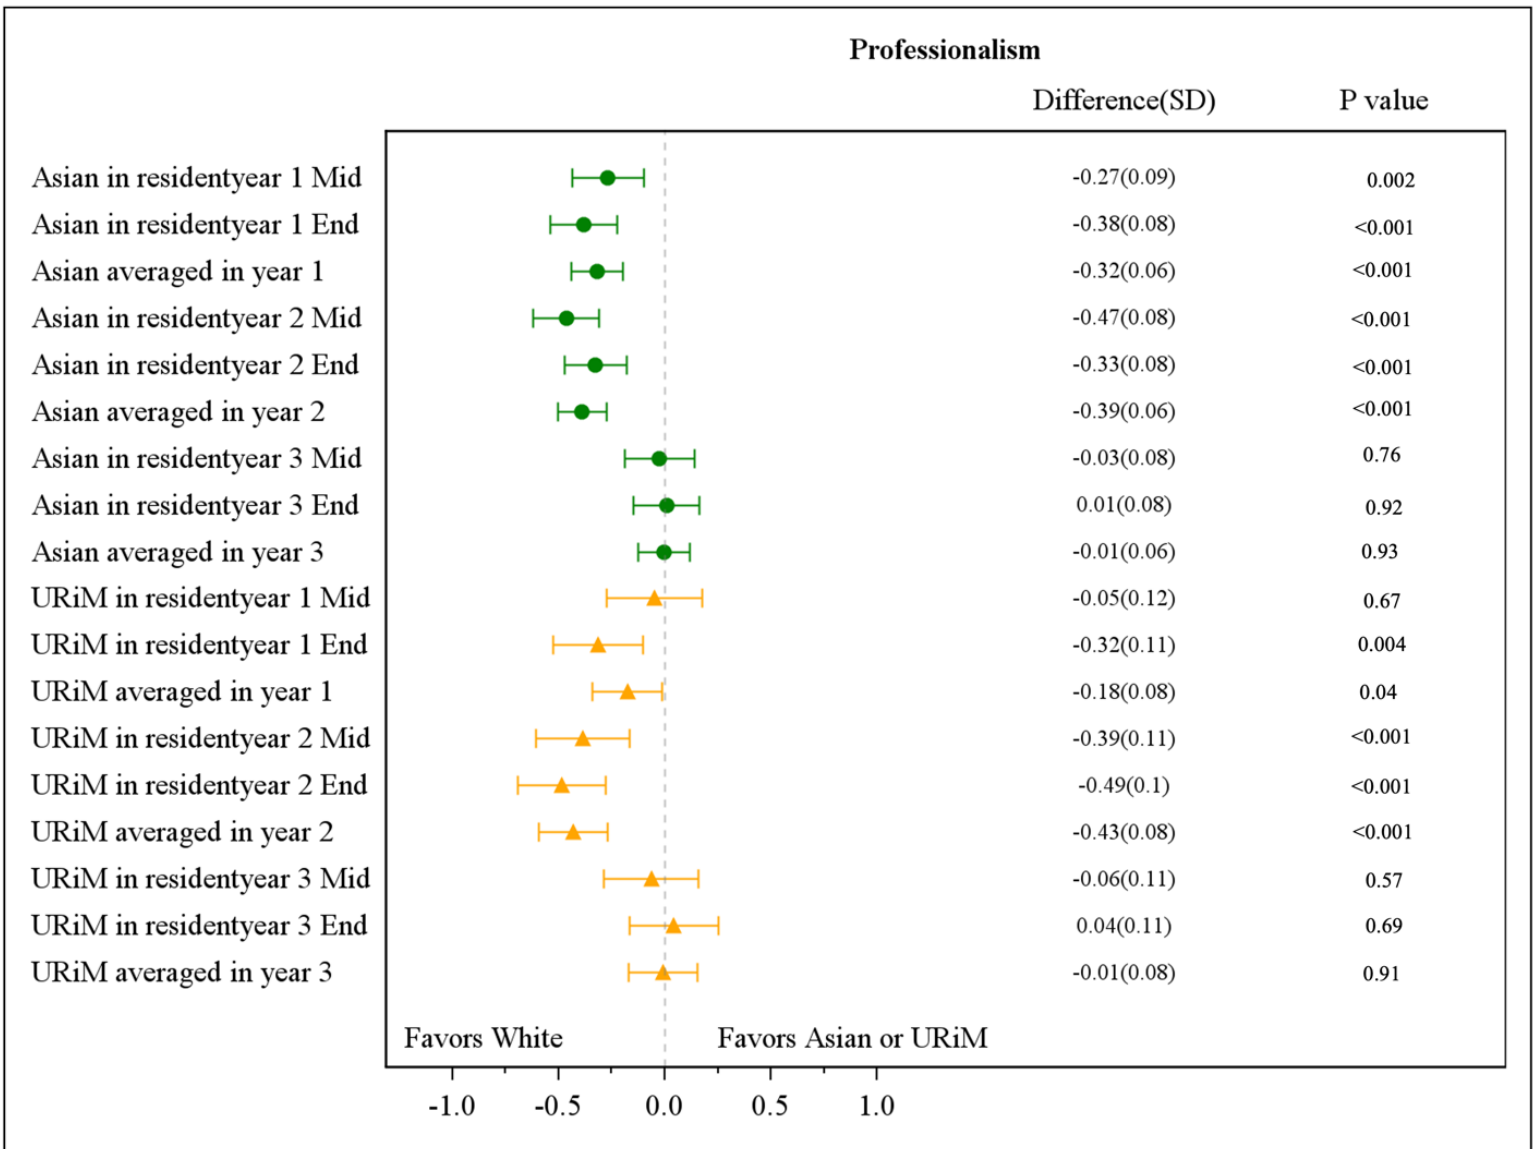

eFigure 2e. adjusted Professionalism

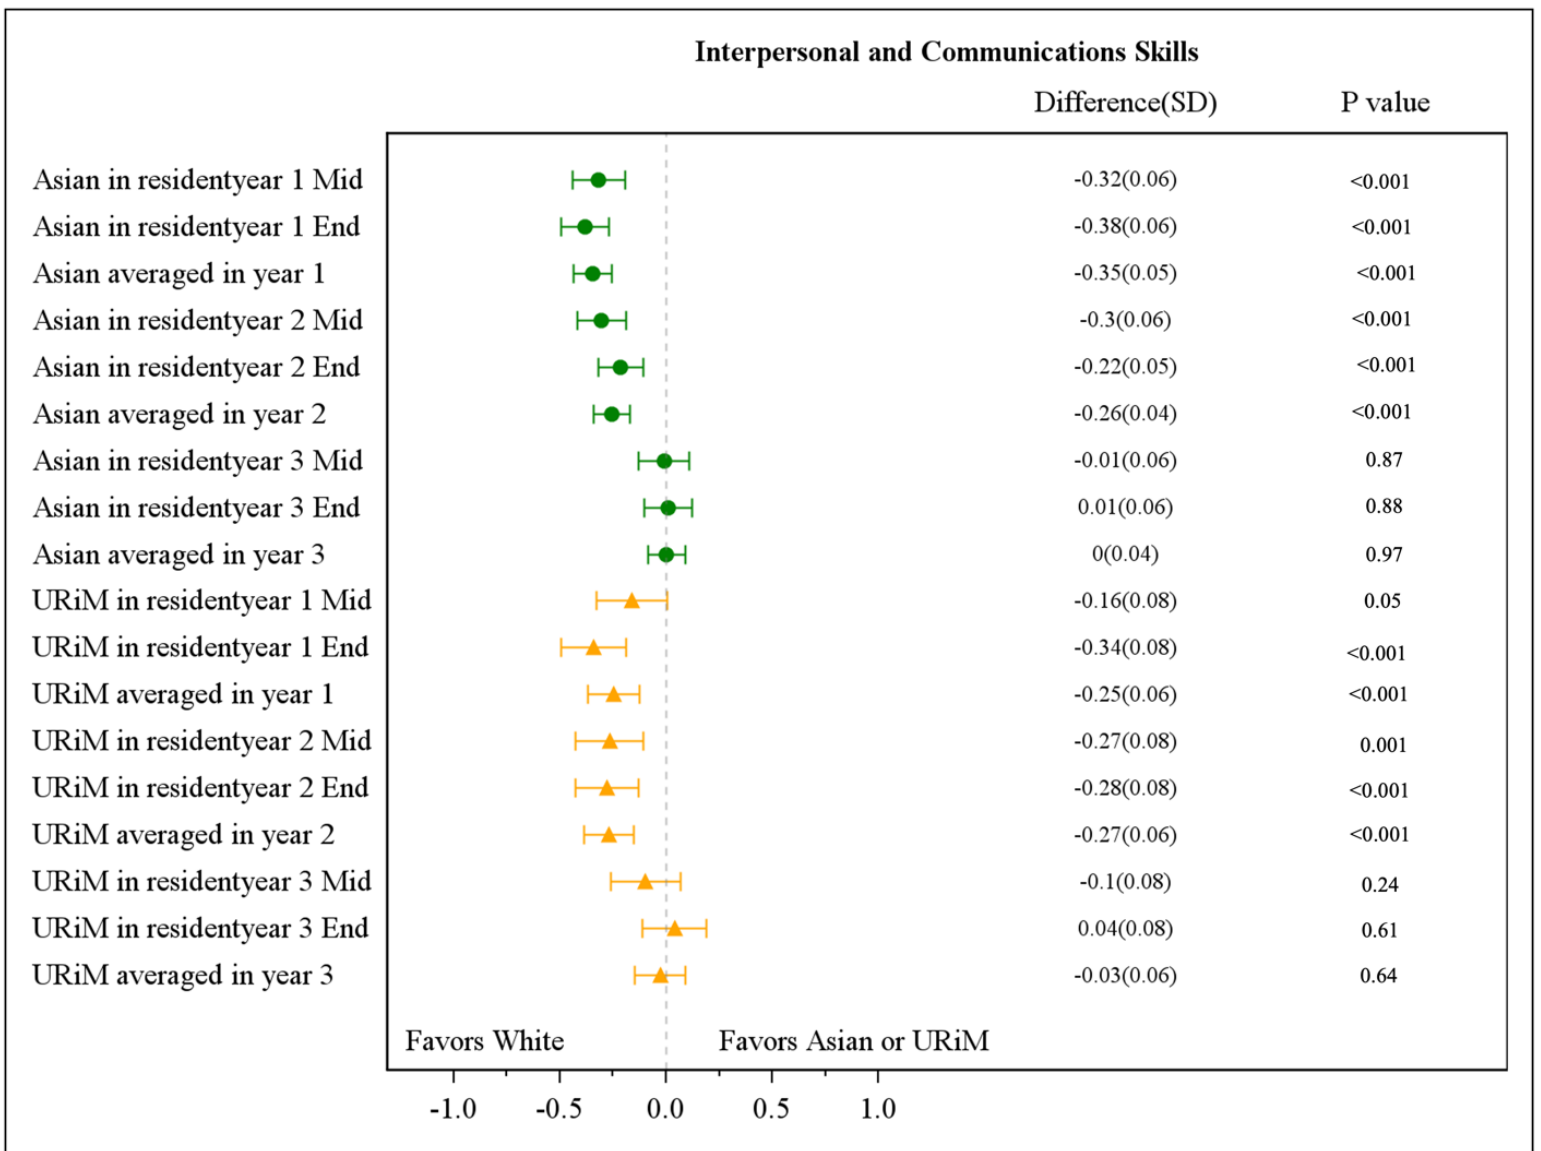

eFigure 2f. adjusted Interpersonal and Communications Skills
