# Supplementary material for: Racial and Ethnic Differences in Internal Medicine Residency Assessments
Source: PubMed Central journal article supplement (PMC9857126; doi:10.1001/jamanetworkopen.2022.47649), 2022-12-29
Supplement: jamanetwopen-e2247649-s002.pdf [file jamanetwopen-e2247649-s002.pdf]

## **Data Sharing Statement**

Boatright. Racial and Ethnic Differences in Internal Medicine Residency Assessments. *JAMA Netw Open*. Published December 29, 2022. doi:10.1001/jamanetworkopen.2022.47649

### **Data**

**Data available:** No
